# Supplementary material for: Spatial expression of transcription factors in Drosophila embryonic organ development
Source: PubMed Central journal article supplement (PMC4053779; doi:10.1186/gb-2013-14-12-r140), 2013-12-20

### Developmental Time Course

### Larval and Adult Dissected Speciment

Embryos      Larvae      Pupae      Adults

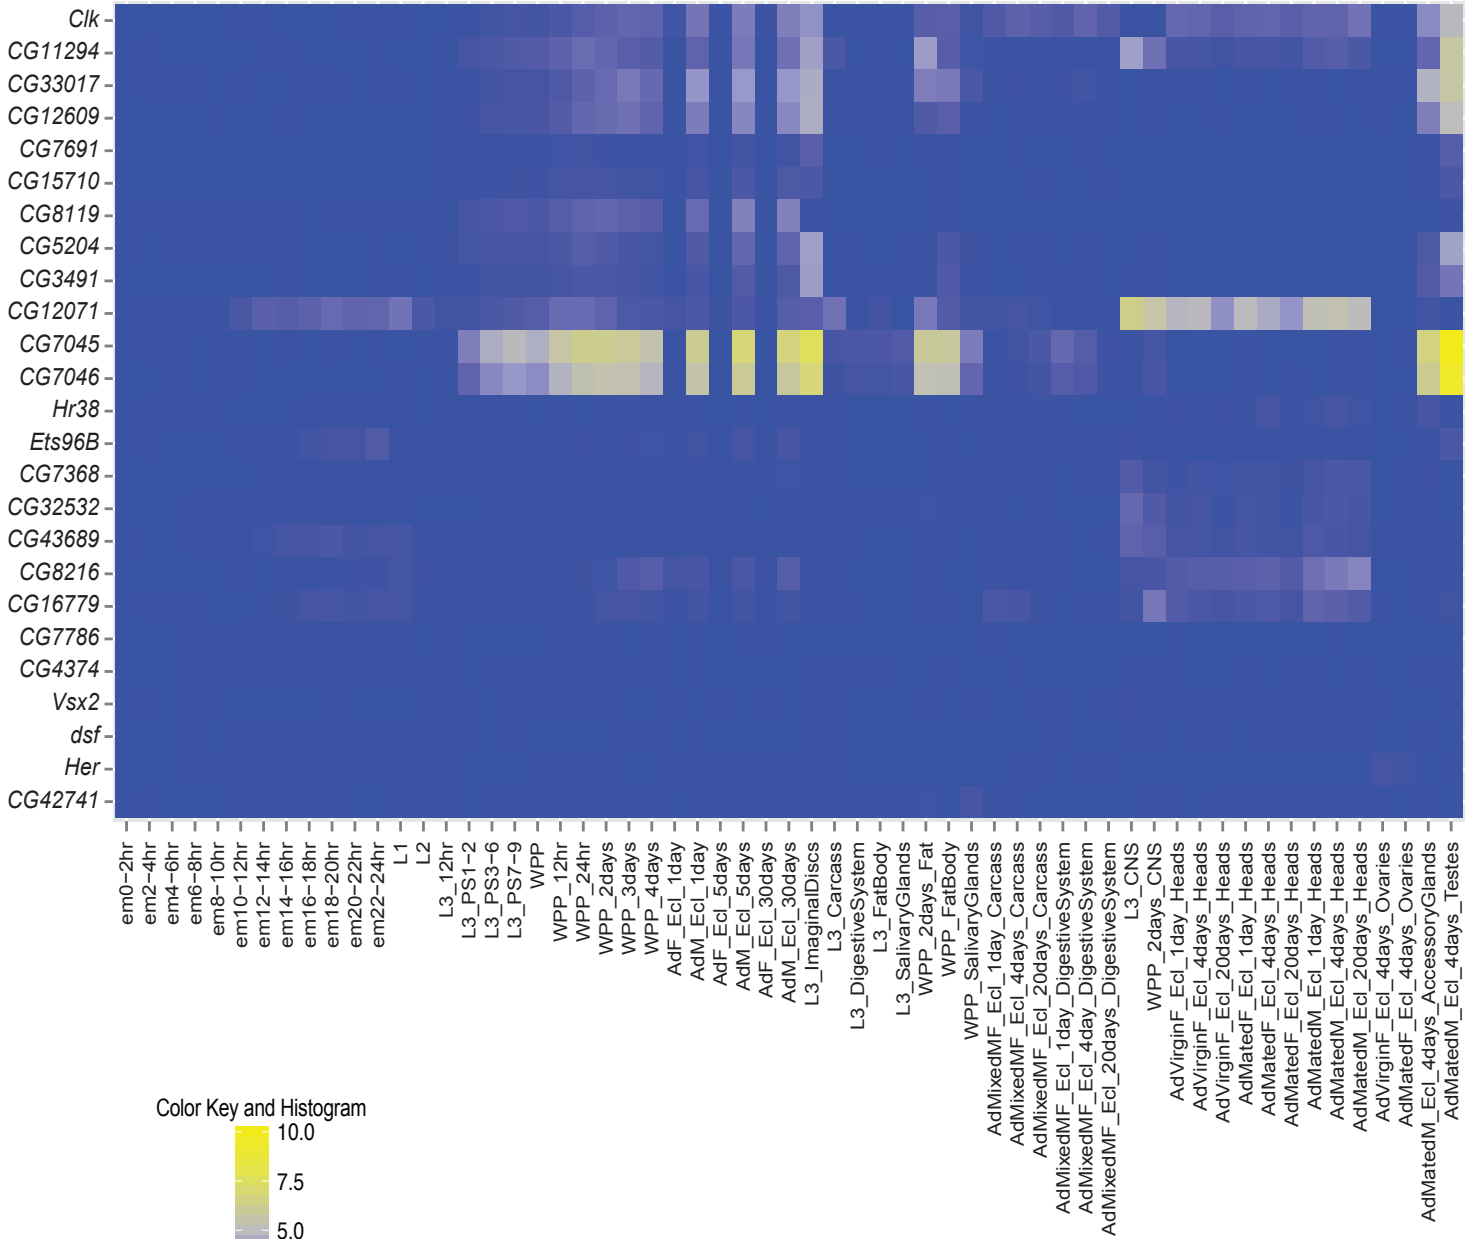

Supplement: gb-2013-14-12-r140-S7.pdf [file gb-2013-14-12-r140-S7.pdf]
